# Supplementary material
Source: MDPI journal article supplement (https://www.mdpi.com/2076-3417/12/7/3290)
Supplement: s1 [file s1]

## Supporting Information

Yeast extract affecting the transformation of biogenic tooeleite and its stability

Qingzhu Li <sup>a, b, c</sup>, Qianwen Liu <sup>a</sup>, Xi Wang <sup>a</sup>, Qi Liao <sup>a, b, c</sup>, Hui Liu <sup>a, b, c</sup>, Qingwei Wang\* <sup>a, b, c</sup>

<sup>a</sup> School of Metallurgy and Environment, Central South University, Changsha, 410083, China

<sup>b</sup> Chinese National Engineering Research Center for Control & Treatment of Heavy Metal  
Pollution, Changsha, 410083, China

<sup>c</sup> Water Pollution Control Technology Key Lab of Hunan Province, Changsha, 410083, China

\* Corresponding author.

Qingwei Wang

Tel: +86 731 89873970

*E-mail address:* qw\_wang@csu.edu.cn (Q. Wang)

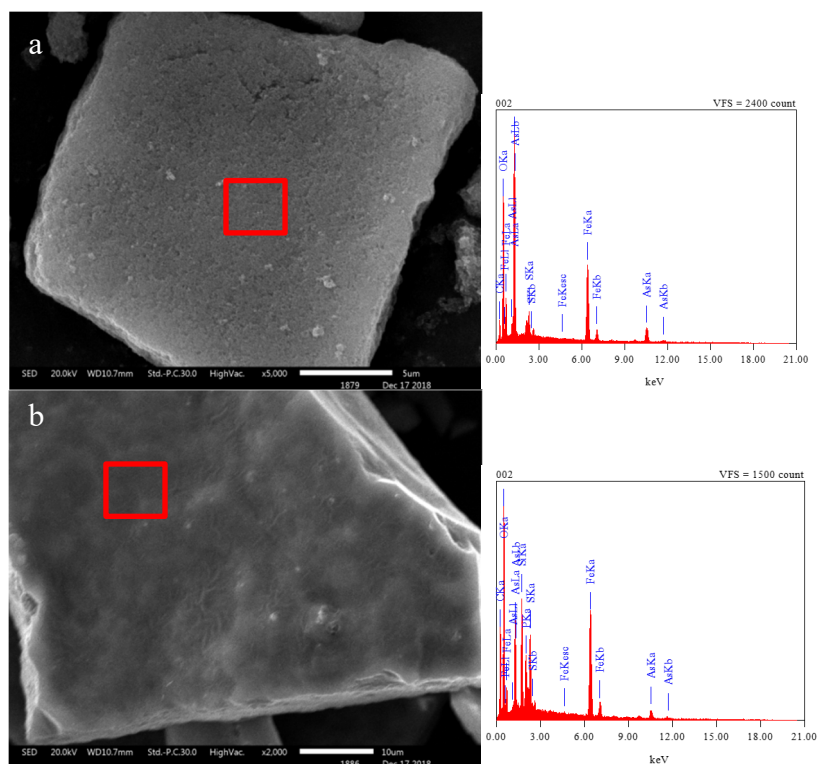

**Figure S1.** SEM images and EDS analysis of precipitates obtained without (a) or with (b) yeast extract at 3h

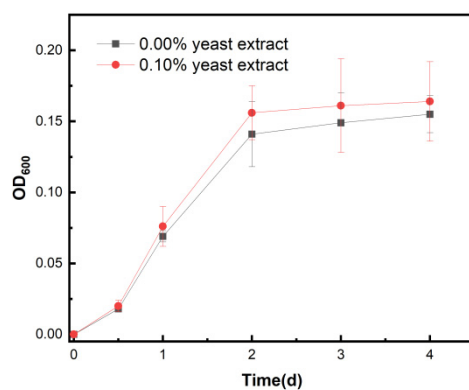

**Figure S2.** Dynamic changes of OD<sub>600</sub> under 0.00% and 0.10% yeast extract.

**Table S1.** EDS analysis results of precipitates obtained with and without yeast extract (YE) at 3h

|          | C (Mass%) | Fe (Mass%) | As (Mass%) |
|----------|-----------|------------|------------|
| 0.00% YE | 5.15      | 45.10      | 30.73      |
| 0.10% YE | 11.33     | 46.61      | 12.80      |

**Table S2.** ICP analysis results of precipitates obtained with (a) and without (b) yeast extract (YE) at different reaction time

**a**

| Time(h) | As (w/w) | Fe (w/w) | S (w/w) | Fe/As(molar ratio) |
|---------|----------|----------|---------|--------------------|
| 3       | 13.05%   | 21.96%   | 3.42%   | 2.25               |
| 6       | 15.35%   | 23.50%   | 3.54%   | 2.05               |
| 24      | 17.79%   | 23.56%   | 3.18%   | 1.77               |
| 96      | 21.71%   | 25.97%   | 3.90%   | 1.60               |

**b**

| Time(h) | As (w/w) | Fe (w/w) | S (w/w) | Fe/As(molar ratio) |
|---------|----------|----------|---------|--------------------|
| 3       | 18.16%   | 26.18%   | 3.55%   | 1.93               |
| 6       | 18.98%   | 25.00%   | 3.65%   | 1.76               |
| 24      | 17.45%   | 24.93%   | 3.30%   | 1.91               |
| 96      | 16.24%   | 26.26%   | 3.79%   | 2.17               |
